# Supplementary material for: Iron-doping-induced formation of Ni–Co–O nanotubes as efficient bifunctional electrodes
Source: Royal Society of Chemistry journal article supplement (doi:10.1039/d3dt03291d), 2023-12-19
Supplement: d3dt03291d1.pdf [file d3dt03291d1.pdf]

Supporting information

## **Iron doping induced formation of Ni-Co-O Nanotube as Efficient Bifunctional Electrodes**

Zhaohui Liu,<sup>\*a</sup> Xinjiang Zhang,<sup>a</sup> Xiaona Mi,<sup>a</sup> Zirun Yang<sup>a</sup> and haihua Huang<sup>\*b</sup>

<sup>a</sup> School of Material Science and Engineering, Yancheng Institute of Technology,

Yancheng 224051, China

<sup>b</sup> School of Material Science and Engineering, Liaocheng University, Shandong

252059, China

\*Corresponding author

Email: [zhliu@ycit.edu.cn](mailto:zhliu@ycit.edu.cn) (Zhaohui Liu)

[huanghaihua@lcu.edu.cn](mailto:huanghaihua@lcu.edu.cn) (Haihua Huang)

## Electrochemical measurements details

The turnover frequency (TOF,  $s^{-1}$ ) for HER was calculated with the following equation:

$$TOF=(|J| \times A)/2Fn \quad (1)$$

Where  $|J|$  ( $A \cdot cm^{-2}$ ) is the current density at a fixed voltage during the LSV measurement,  $A$  is the geometric area of the working electrode ( $1 \text{ cm}^2$ ), the factor of 2 is the corresponding electron transfer numbers,  $F$  is the Faraday constant ( $96485 \text{ C} \cdot \text{mol}^{-1}$ ), and  $n$  is the number of active sites (mol).

$$n=Q/2F \quad (2)$$

The number of active sites ( $n$ ) was determined by the cyclic voltammetry (CV) with a scan rate of  $10 \text{ mV s}^{-1}$ . The number of the voltammetric charges ( $Q$ ) could be determined by integrating.

The turnover frequency (TOF,  $s^{-1}$ ) for OER was calculated with the following equation:

$$TOF=(|J| \times A)/4Fn \quad (3)$$

$$n=Q/4F \quad (4)$$

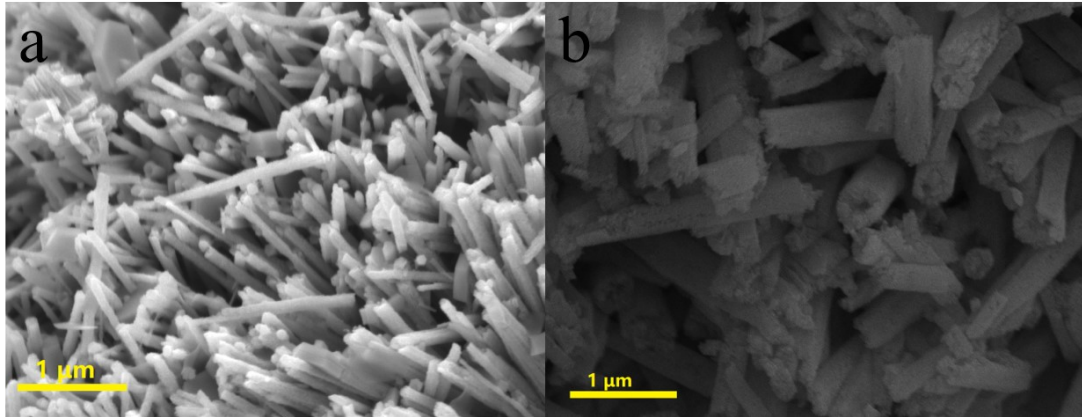

**Fig. S1** (a)  $\text{Fe}_3\text{-NCO}$  with an annealing temperature at 300 °C and (b) at 500 °C.

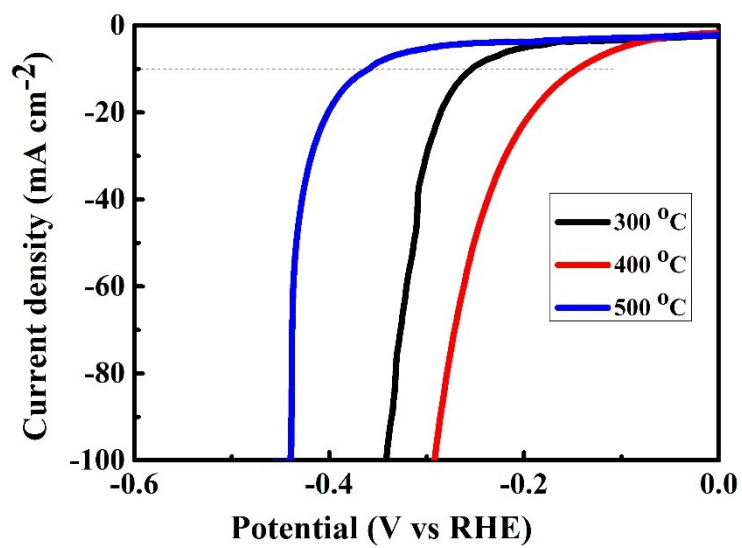

**Fig. S2** LSV curves of HER at 5 mV s<sup>-1</sup> of the Fe<sub>3</sub>-NCO at different annealing temperature.

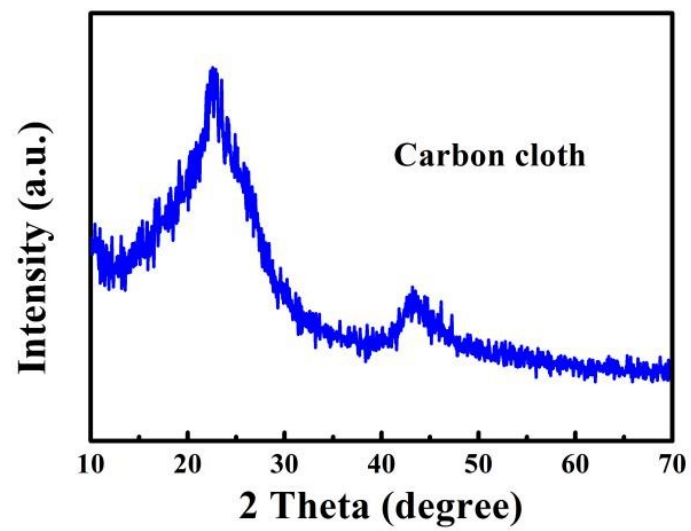

**Fig. S3** XRD patterns of carbon textiles.

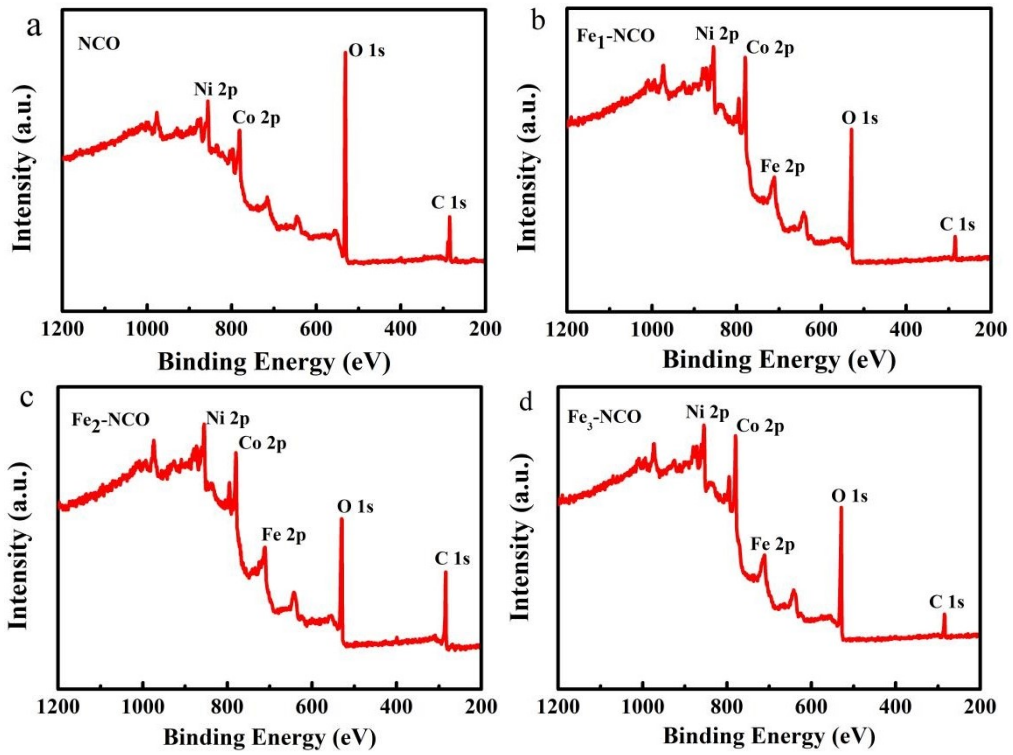

**Fig. S4** Overall XPS survey spectra of as-prepared various electrocatalysts.

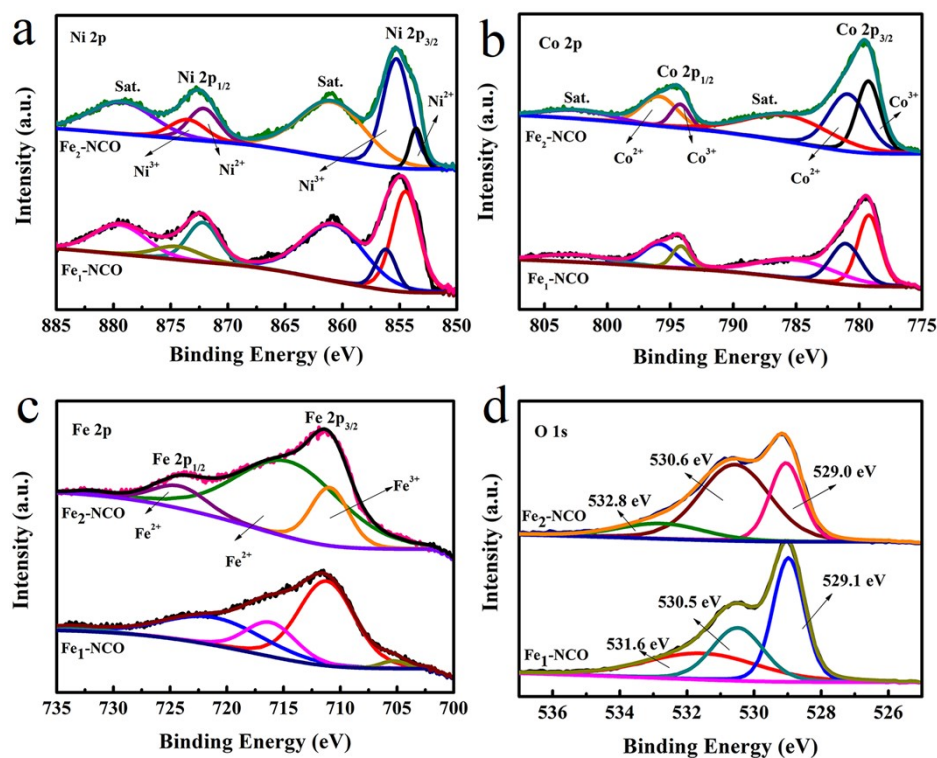

**Fig. S5** (a) Ni 2p spectra of Fe<sub>1</sub>-NCO and Fe<sub>2</sub>-NCO, (b) Co 2p spectra of Fe<sub>1</sub>-NCO and Fe<sub>2</sub>-NCO, (c) Fe 2p spectra of Fe<sub>1</sub>-NCO and Fe<sub>2</sub>-NCO and (d) O 1s spectrum of Fe<sub>1</sub>-NCO and Fe<sub>2</sub>-NCO.

According to the Ni2p spectra of NiCo<sub>2</sub>O<sub>4</sub>, the Ni2p spectrum in Figure S4a was composed of two spinorbit doublets and two satellite, the peaks of Fe<sub>1</sub>-NCO at about 854.9 and 872.9eV were corresponded to Ni<sup>2+</sup>, whereas those at 856.2 and 874.9 eV were fitted with Ni<sup>3+</sup>. For Fe<sub>2</sub>-NCO the peaks at 854.7 and 873.1 eV was fitted with Ni<sup>2+</sup>, while those at 855.9 and 874.7 eV belongs to Ni<sup>3+</sup>, respectively.<sup>1</sup> The Co2p

spectrum in Figure S4b was fitted into both Co 2p<sub>1/2</sub> and Co 2p<sub>3/2</sub> with a shakeup satellite for each. The peaks of Fe<sub>1</sub>-NCO situated at 781.9 and 796.9 eV can be indexed into Co<sup>2+</sup> species, while those at 779.7 and 794.8 eV correspond to Co<sup>3+</sup>.<sup>2</sup> The spin-orbit located at 781.8 and 797.1 eV of Fe<sub>2</sub>-NCO can be ascribed to Co<sup>2+</sup> and the binding energies found at 779.9 and 795.8 can be attributed to Co<sup>3+</sup>. Compared to pristine NiCo<sub>2</sub>O<sub>4</sub> (NCO), the binding energies of Ni 2p and Co 2p in Fe<sub>1</sub>-NCO and Fe<sub>2</sub>-NCO were shifted to lower values. As for the Fe 2p spectrum of Fe<sub>1</sub>-NCO, the characteristic peaks of Fe<sup>3+</sup> occur at 711.4 eV, while that of Fe<sub>2</sub>-NCO at 711.6 eV, respectively.<sup>3</sup>



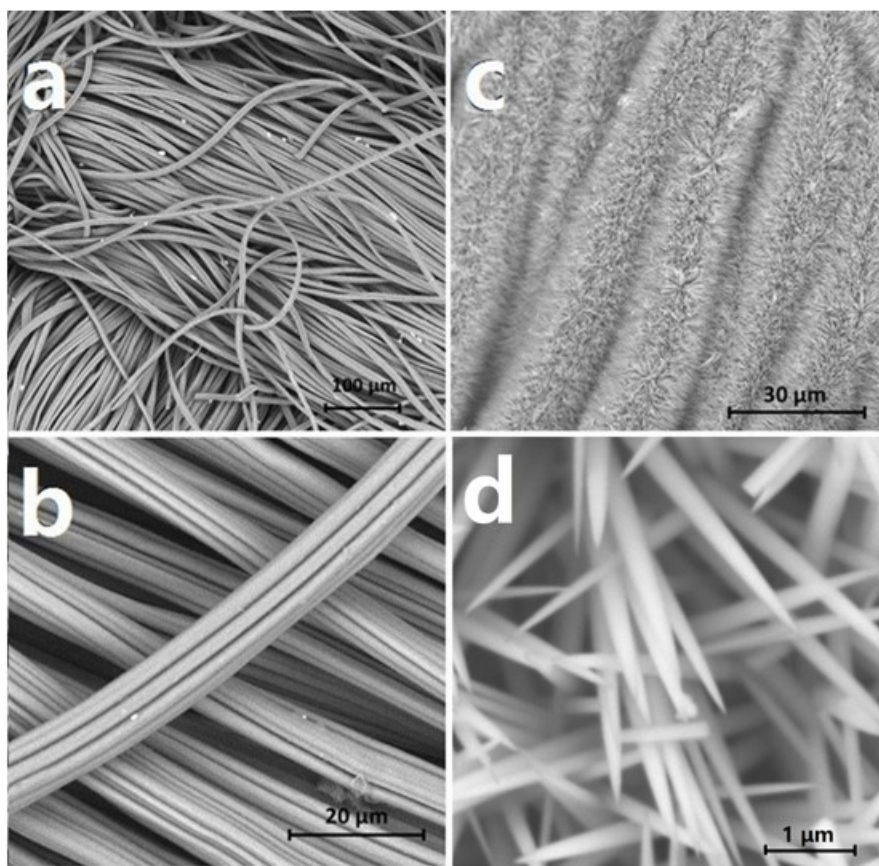

**Fig. S6** Low (a) and high (b) magnification of SEM images of the carbon textiles, Low (c) and high (d) magnifications of the NCO.

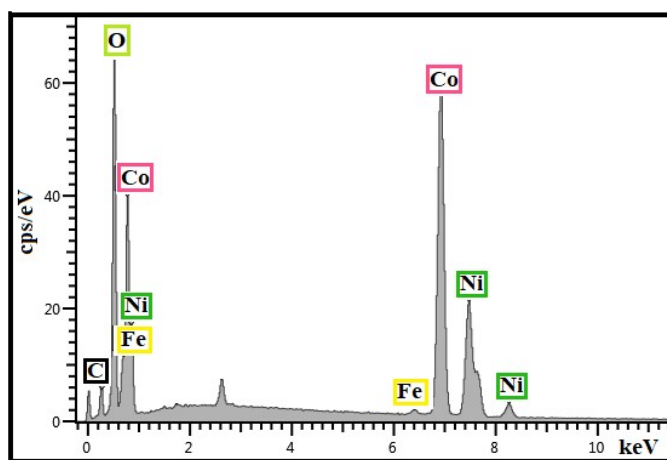

**Fig. S7** EDS of Fe<sub>3</sub>-NCO.

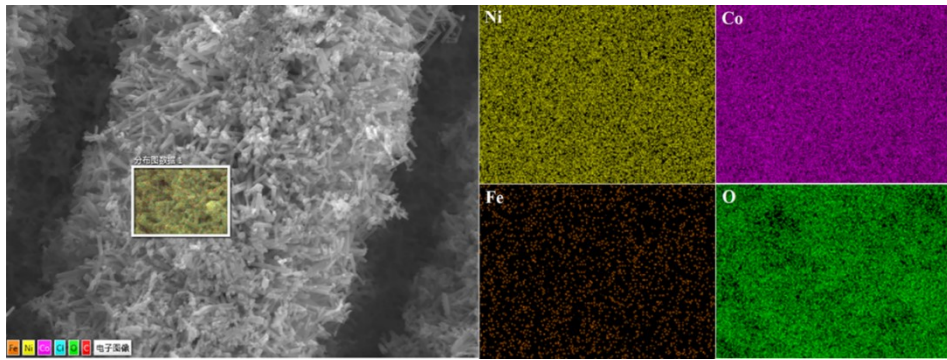

**Fig. S8** The element mapping analysis of Fe<sub>3</sub>-NCO.

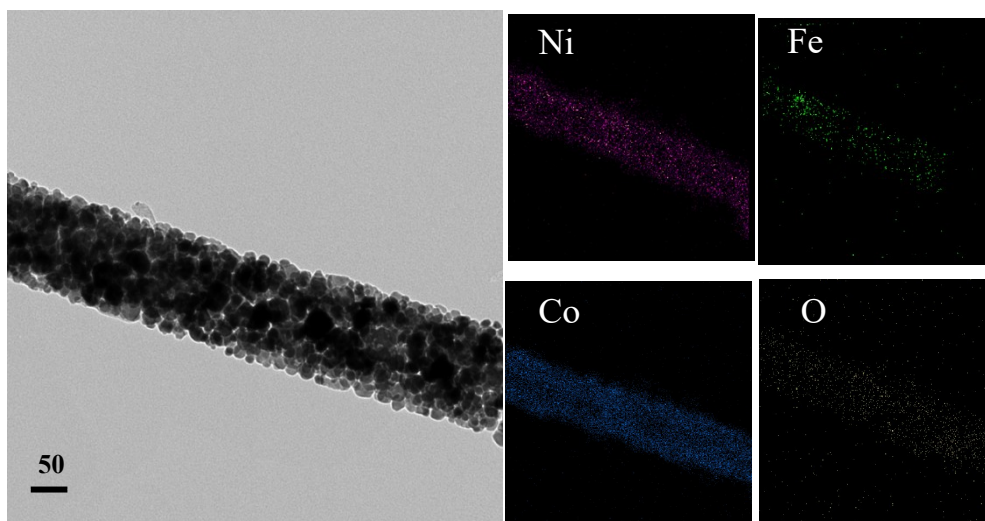

**Fig. S9** The EDS mapping images of Fe<sub>3</sub>-NCO.

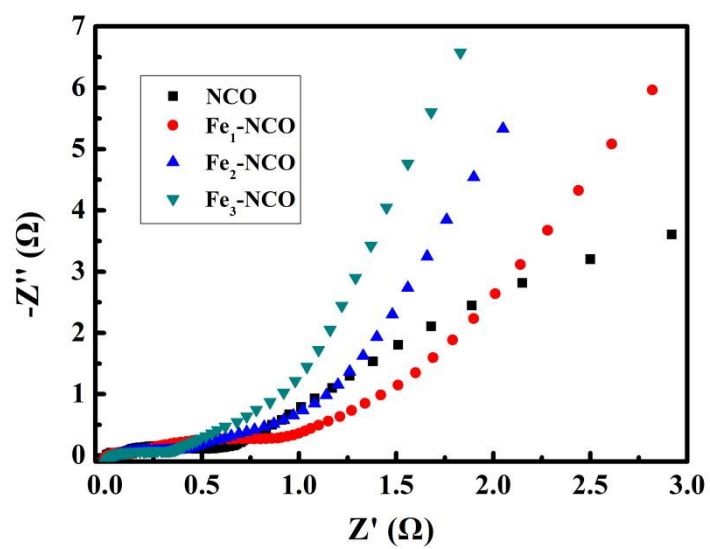

**Fig. S10** Nyquist plots of various catalysts in 1 M KOH.

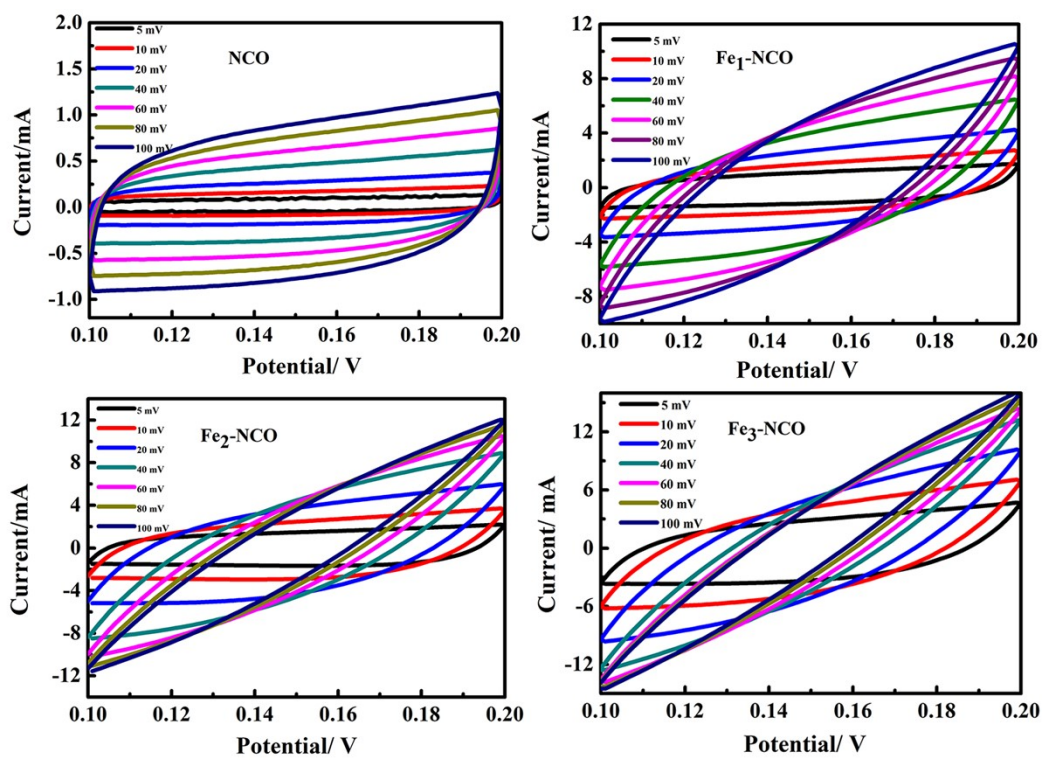

**Fig. S11** CV curves of the various catalysts for the OER in 1 M KOH.

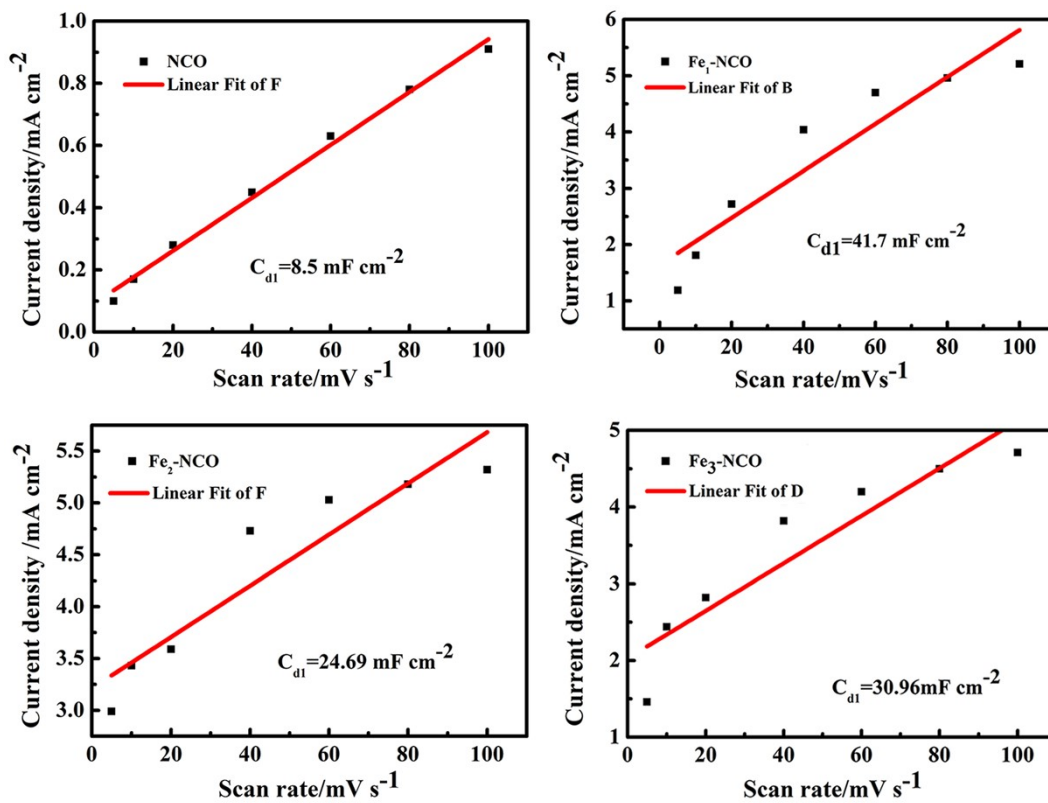

**Fig. S12** ECSA of the various catalysts in 1 M KOH.

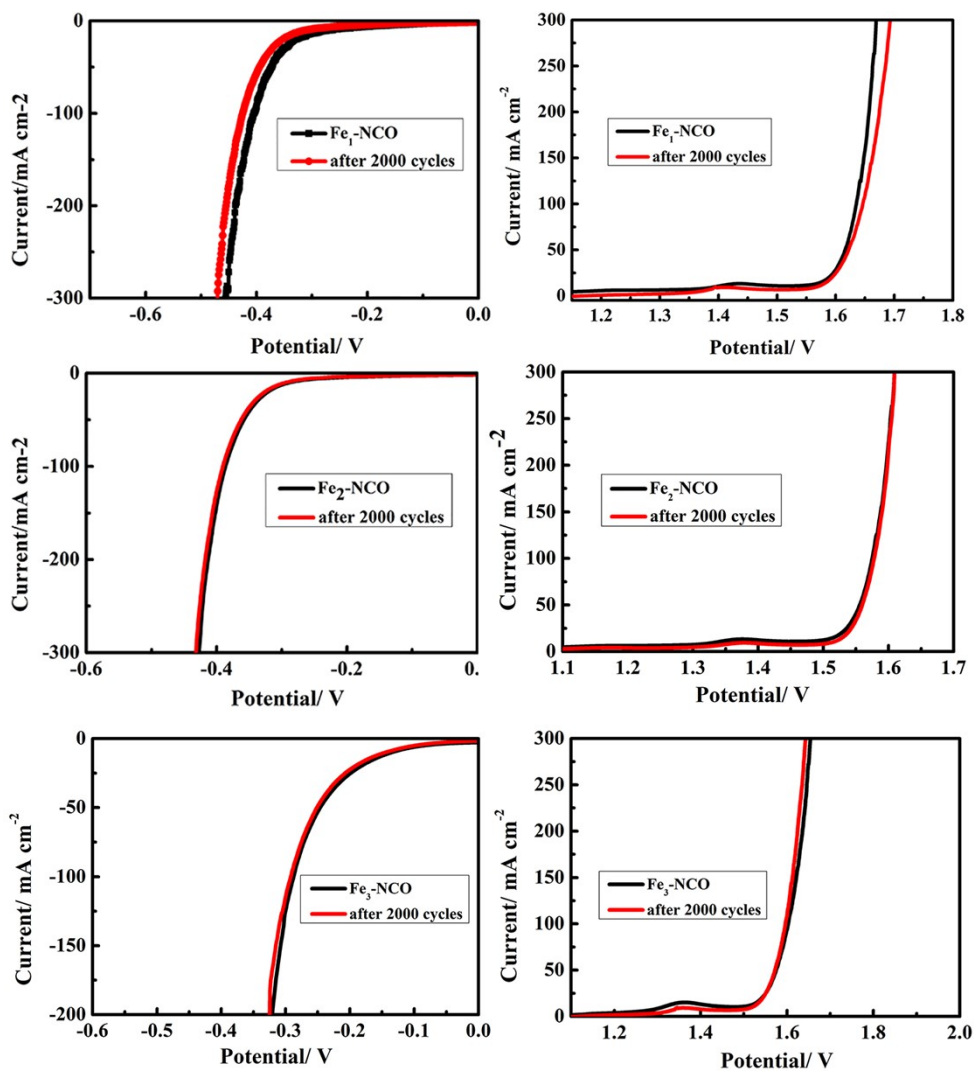

**Fig. S13** LSV curves of the various electrodes for HER and OER before and after 2000



continuous cycles.

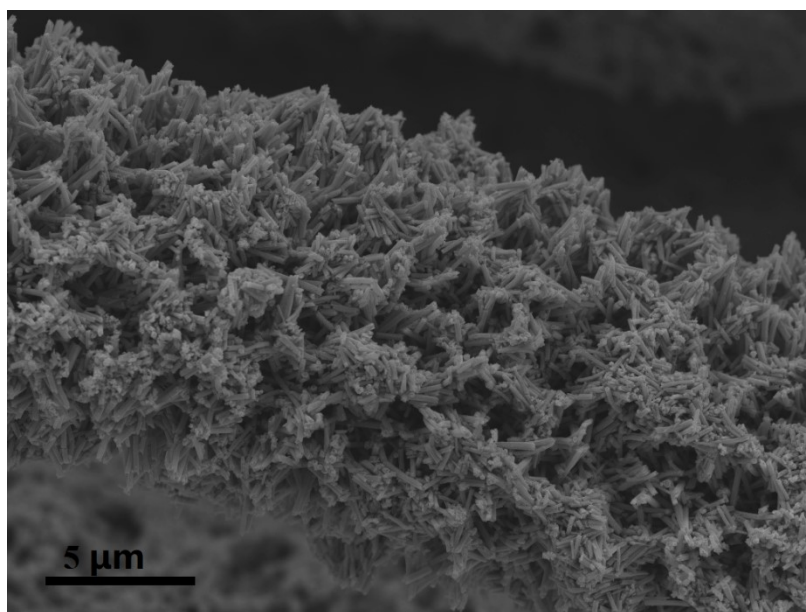

**Fig. S14** SEM image of Fe<sub>3</sub>-NCO after 2000 continuous cycles in the alkaline electrolyte.

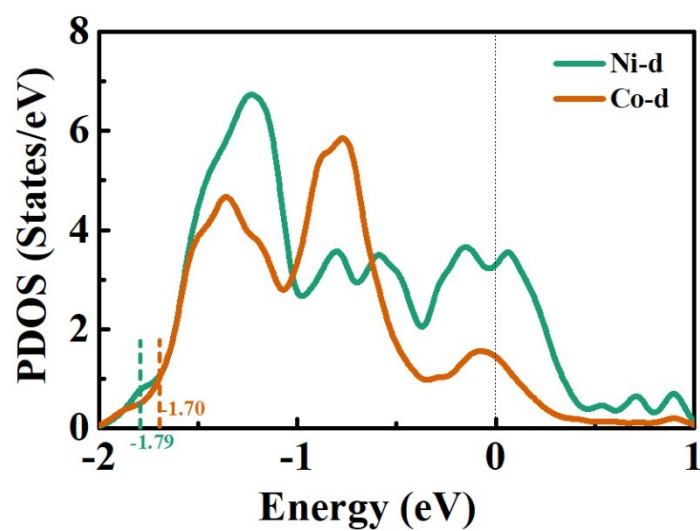

**Fig.S15** The projected density-of-states of d orbitals of Ni, Co sites with aligned Fermi level in NCO.

**Table S1.** Elemental compositions of various samples

| Sample               | Ni (wt%) | Co (wt%) | Fe (wt%) | Atomic ratio<br>of Ni, Co |
|----------------------|----------|----------|----------|---------------------------|
| NCO                  | 22.26    | 46.86    |          | 1:2.11                    |
| Fe <sub>1</sub> -NCO | 20.20    | 42.90    | 5.63     | 1:2.12                    |
| Fe <sub>2</sub> -NCO | 10.28    | 22.49    | 7.21     | 1:2.18                    |
| Fe <sub>3</sub> -NCO | 12.99    | 30.15    | 9.36     | 1:2.32                    |

## References

- 1 Z. Liu, H. Tan, D. Liu, X. Liu, J. Xin, J. Xie, M. Zhao, L. Song and H. Liu, *Adv. Sci.* 2019, **6**, 1801829.
- 2 M. Yu, S. Zhou, Z. Wang, J. Zhao and J. Qiu, *Nano Energy*, 2018, **44**, 181-190.
- 3 J. Zhang, X. Shang and H. Ren, *Adv. Mater.* 2019, **31**, 1905107.
